# Supplementary material for: Al3+-controlled synthesis and magnetic property of α-Fe2O3nanoplates
Source: Royal Society of Chemistry journal article supplement (doi:10.1039/c2ce26111a), 2012-11-01
Supplement: c2ce26111a.pdf [file c2ce26111a.pdf]

## Electronic Supporting Information (ESI)

### Al<sup>3+</sup>-Controlled Synthesis and Magnetic Property of $\alpha$ -Fe<sub>2</sub>O<sub>3</sub>

#### Nanoplates

Rongmei Liu, Yuanwen Jiang, Qingyi Lu,\* Wei Du and Feng Gao\*

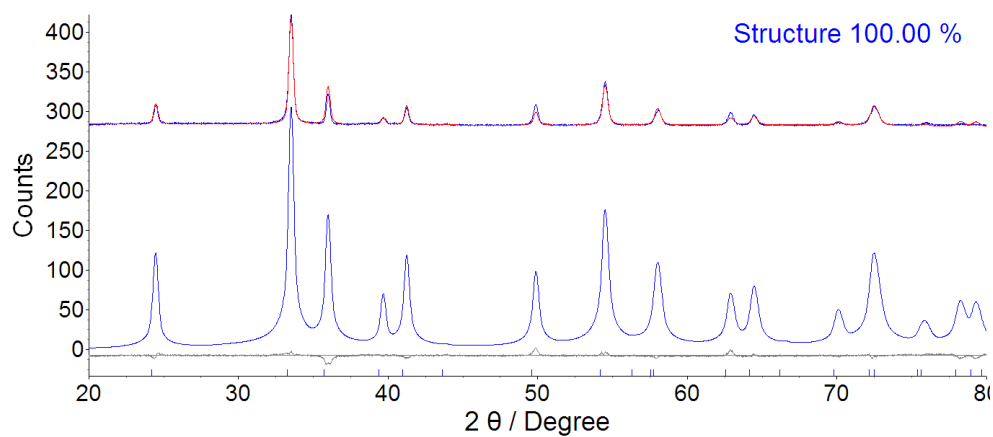

*R*-3c:  $a = 5.025 \text{ \AA}$ ,  $c = 13.717 \text{ \AA}$ .

$R_{wp} = 1.089\%$ ,  $R_{exp} = 0.347\%$ ,  $R_p = 0.646\%$ .

Figure S1 Rietveld XRD pattern of the prepared uniform  $\alpha$ -Fe<sub>2</sub>O<sub>3</sub> Nanoplates.

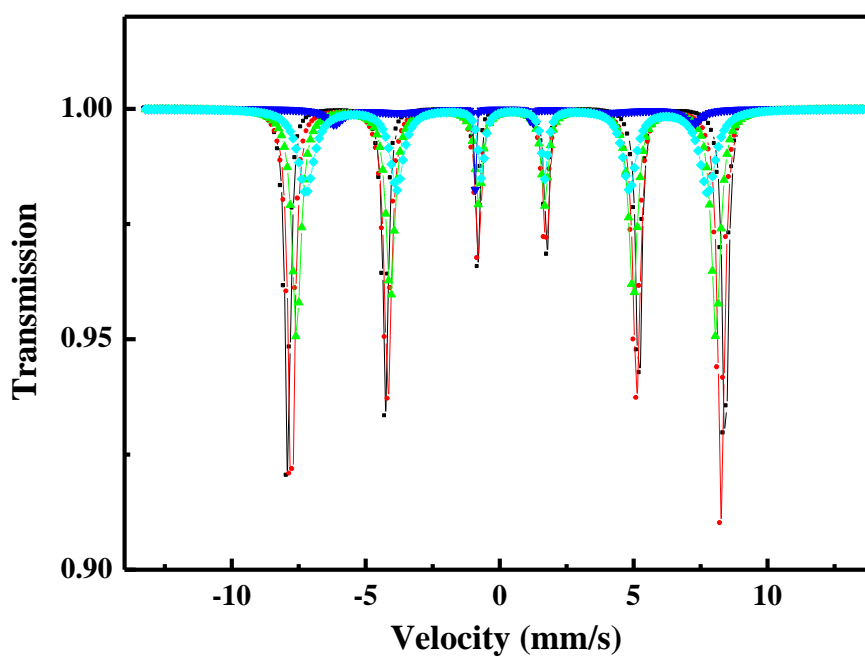

Figure S2  $^{57}\text{Fe}$  Mössbauer sub-spectra recorded at 298 K for the obtained  $\alpha\text{-Fe}_2\text{O}_3$  nanoplates

Table S1  $^{57}\text{Fe}$  Mössbauer parameters recorded at 298 K for the obtained  $\alpha\text{-Fe}_2\text{O}_3$  nanoplates.

| <b>Compound</b>                | <b><math>\Delta</math> (mm/s)</b> | <b><math>\Delta</math> (mm/s)</b> | <b>H (kOe)</b> | <b>Area (%)</b> |
|--------------------------------|-----------------------------------|-----------------------------------|----------------|-----------------|
| $\alpha\text{-Fe}_2\text{O}_3$ | 0.36                              | -0.21                             | 507.9          | 24.2            |
|                                | 0.36                              | -0.22                             | 498.7          | 32.0            |
|                                | 0.35                              | -0.21                             | 486.9          | 24.9            |
|                                | 0.33                              | 0.38                              | 416.1          | 3.0             |
|                                | 0.39                              | -0.23                             | 466.3          | 15.9            |
